# Supplementary material for: Simple but effective: thermally stable Cu–ESiMe3via NHC ligation
Source: Royal Society of Chemistry journal article supplement (doi:10.1039/c5cc00940e), 2015-01-01
Supplement: c5cc00940e1.pdf [file c5cc00940e1.pdf]

## Supporting Information

### Simple but Effective: Thermally Stable Cu-ESiMe<sub>3</sub> via NHC Ligation†

Mahmood Azizpoor Fard,<sup>a</sup> Florian Weigend<sup>b,c</sup> and John F. Corrigan<sup>\*a,d</sup>

<sup>a</sup> *Department of Chemistry, The University of Western Ontario,*

*London, ON, N6A 5B7 (Canada), Fax: (+1)519-661-3022.*

*E-mail: corrigan@uwo.ca*

<sup>b</sup> *Institut für Nanotechnologie, Karlsruher Institut für Technologie (KIT), Hermann-von-Helmholtz-Platz 1, 76344 Eggenstein-Leopoldshafen, Germany.*

<sup>c</sup> *Institut für Physikalische Chemie, Karlsruher Institut für Technologie (KIT), Campus Süd, Fritz-Haber-Weg 2, 76131 Karlsruhe, Germany.*

<sup>d</sup> *Centre for Advanced Materials and Biomaterials Research, The University of Western Ontario, London, ON, N6A 5B7 (Canada)*

corrigan@uwo.ca 1-519 661-2111 ext 86387

## Detailed Experimental

### General considerations

All synthetic and handling procedures were carried out under an inert atmosphere of high purity dried nitrogen using Schlenk line techniques and inert atmosphere glove boxes. Non-chlorinated solvents were dried using an MBraun MB-SP Series Solvent Purification system with tandem activated alumina (THF) or activated alumina-activated copper redox catalyst (pentane). Chloroform-d and dichloromethane were dried and distilled over  $P_2O_5$ . Dichloromethane-d was purchased from CIL. Mercuric(II) acetate was used as received from commercial source (Aldrich). The corresponding carbene copper(I) acetate  $IPrCu(OAc)$ ,<sup>1</sup>  $S(SiMe_3)_2$ ,<sup>2</sup>  $Se(SiMe_3)_2$ <sup>3</sup> and  $Te(SiMe_3)_2$ <sup>3</sup> were prepared according to literature procedures.

NMR spectra were recorded on Varian Mercury 400, Inova 400 and Inova 600 NMR spectrometers.  $^1H$  and  $^{13}C$  chemical shifts are referenced to  $SiMe_4$ , using residual solvent as a secondary peak ( $^1H$  chemical shifts of compound **1** reference to trace amount of thf because of overlapping and low intensity of the  $CDCl_3$  solvent peak).  $^{77}Se$  chemical shift is referenced to  $Me_2Se$  and  $^{125}Te$  chemical shift is referenced to  $Me_2Te$ . The peak from  $CO_2$  in the  $^{13}C$  NMR spectra arises from dry ice, used for making NMR samples at low temperature. Elemental analysis was performed by Laboratoire d'Analyse Élémentaire de l'Université de Montréal, Canada.

Single-crystal X-ray diffraction measurements were completed on a Bruker APEX-II CCD diffractometer equipped with graphite-monochromated  $Mo\ K\alpha$  ( $\lambda = 0.71073\text{ \AA}$ ) radiation. Single crystals of the complexes were carefully selected, immersed in paraffin oil and mounted on

MiteGen micromounts. The structures were solved using direct methods and refined by the full-matrix least-squares procedure of SHELXTL. All non-hydrogen atoms, with the exception of disordered carbon atoms of the solvent, were refined with anisotropic thermal parameters. Hydrogen atoms were included as riding on their respective carbon atoms. In compound **4**, one of the iso-propyl groups of the carbene was modelled as being disordered over two positions, with refined complementary site occupancy factors. Files CCDC 1045224-1045227 contain the supplementary crystallographic data for this paper. These data can be obtained free of charge from the Cambridge Crystallographic Data Centre via [www.ccdc.cam.ac.uk/data\\_request/cif](http://www.ccdc.cam.ac.uk/data_request/cif).

## Synthesis

**Synthesis of IPrCuSSiMe<sub>3</sub> (1).** 46  $\mu$ L of S(SiMe<sub>3</sub>)<sub>2</sub> (0.218 mmol) was added to a cold (-70 °C) solution of one equivalent of IPrCu(OAc) (111 mg, 0.217 mmol) in 10 mL tetrahydrofuran, followed by storing the solution at -25 °C overnight. The reaction was layered with 30 mL of pentane at low temperature. Five to six days later colourless plate-like single crystals were obtained and identified by X-ray crystallography to be IPrCuSSiMe<sub>3</sub>. The crystals were washed with 3 $\times$ 10 mL cold pentane (-70°C) and dried under dynamic vacuum at 0°C.

**1** can be precipitated in higher yields by adding 40 mL of cold pentane to reaction solutions; storing at -25°C overnight forms an off-white suspension. Washing and drying the precipitated solid with 5 $\times$ 10 mL cold pentane, followed by drying under vacuum at 0 °C, gives **1** as an analytically pure product as small crystals (61.5% yield); m.p. 171-172 °C. <sup>1</sup>H NMR (CDCl<sub>3</sub>, 399.76 MHz, -10 °C):  $\delta$  7.46 (t, *J* = 7.8 Hz, 2H, *para*-CH), 7.28 (d, *J* = 7.8 Hz, 4H, *meta*-CH), 7.13 (s, 2H, NCH), 2.57 (sept., *J* = 7.0 Hz, 4H, CH(CH<sub>3</sub>)<sub>2</sub>), 1.31 (d, *J* = 7.0 Hz, 12H, CH(CH<sub>3</sub>)<sub>2</sub>), 1.22 (d, *J* = 7.0 Hz, 12H, CH(CH<sub>3</sub>)<sub>2</sub>), -0.17 (s, 9H, -Si(CH<sub>3</sub>)<sub>3</sub>) ppm; <sup>13</sup>C{<sup>1</sup>H} NMR

(CDCl<sub>3</sub>, 100.53 MHz, -10 °C): 181.1 (NCCu), 145.4 (*ortho*-C), 134.4 (*ipso*-C), 130.2 (*para*-C), 124.0 (*meta*-C), 122.6 (NCH), 28.6 (CH(CH<sub>3</sub>)<sub>2</sub>), 24.9 (CH(CH<sub>3</sub>)<sub>2</sub>), 23.9 (CH(CH<sub>3</sub>)<sub>2</sub>), 6.7 (-Si(CH<sub>3</sub>)<sub>3</sub>) ppm. Anal. Calcd for C<sub>30</sub>H<sub>45</sub>CuN<sub>2</sub>SSi: C, 64.64; H, 8.14; N, 5.03; S, 5.75. Found: C, 64.24; H, 8.28; N, 4.97; S, 5.49.

**Synthesis of IPrCuSSiMe<sub>3</sub> (2).** 53  $\mu$ L of Se(SiMe<sub>3</sub>)<sub>2</sub> (0.211 mmol) was reacted with one equivalent of IPrCu(OAc) (108 mg, 0.211 mmol) in 10 mL tetrahydrofuran as described for the preparation of **1**. Colourless single crystals suitable for X-ray diffraction were obtained after five to six days by layering the mother liquor with 30 mL of pentane at -25°C.

The product can be isolated as an off-white powder by adding 40-50 mL of cold pentane to reaction solutions at -25°C, as described for **1**. Washing and drying the precipitated solid with 5 $\times$ 10 mL cold pentane, followed by drying under vacuum at 0 °C, gives **2** as small crystals (55.4% yield); m.p. 166-168 °C. <sup>1</sup>H NMR (CDCl<sub>3</sub>, 399.76 MHz, -10 °C):  $\delta$  7.46 (t, *J* = 7.8 Hz, 2H, *para*-CH), 7.28 (d, *J* = 7.8 Hz, 4H, *meta*-CH), 7.12 (s, 2H, NCH), 2.58 (sept., *J* = 7.0 Hz, 4H, CH(CH<sub>3</sub>)<sub>2</sub>), 1.31 (d, *J* = 7.0 Hz, 12H, CH(CH<sub>3</sub>)<sub>2</sub>), 1.21 (d, *J* = 7.0 Hz, 12H, CH(CH<sub>3</sub>)<sub>2</sub>), -0.04 (s, 9H, -Si(CH<sub>3</sub>)<sub>3</sub>) ppm; <sup>13</sup>C{<sup>1</sup>H} NMR (CDCl<sub>3</sub>, 100.53 MHz, -10 °C): 181.6 (NCCu), 145.4 (*ortho*-C), 134.4 (*ipso*-C), 130.2 (*para*-C), 124.0 (*meta*-C), 122.6 (NCH), 28.6 (CH(CH<sub>3</sub>)<sub>2</sub>), 25.0 (CH(CH<sub>3</sub>)<sub>2</sub>), 23.9 (CH(CH<sub>3</sub>)<sub>2</sub>), 7.3 (-Si(CH<sub>3</sub>)<sub>3</sub>) ppm; <sup>77</sup>Se NMR (CDCl<sub>3</sub>, 76.20 MHz, -10°C): -481 ppm. Anal. Calcd for C<sub>30</sub>H<sub>45</sub>CuN<sub>2</sub>SeSi: C, 59.63; H, 7.51; N, 4.64. Found: C, 58.43; H, 7.89; N, 4.47.

**Synthesis of IPrCuTeSiMe<sub>3</sub> (3).** 67  $\mu$ L of Te(SiMe<sub>3</sub>)<sub>2</sub> (0.237 mmol) was reacted with one equivalent of IPrCu(OAc) (121 mg, 0.237 mmol) in 10 mL tetrahydrofuran as described for the preparation of **1**. Colourless single crystals suitable for X-ray diffraction were obtained after five to six days by layering the mother liquor with 35 mL of pentane at -25°C.

Compound **3** was isolated as an off-white powder according to the procedure for **1** and **2**; (50.3% yield); m.p. 178-180 °C.  $^1\text{H}$  NMR ( $\text{CDCl}_3$ , 399.76 MHz, -15 °C):  $\delta$  7.47 (t,  $J$  = 7.8 Hz, 2 H, *para*-CH), 7.29 (d,  $J$  = 7.8 Hz, 4 H, *meta*-CH), 7.12 (s, 2H, NCH), 2.58 (sept.,  $J$  = 7.0 Hz, 4 H,  $\text{CH}(\text{CH}_3)_2$ ), 1.33 (d,  $J$  = 7.0 Hz, 12 H,  $\text{CH}(\text{CH}_3)_2$ ), 1.22 (d,  $J$  = 7.0 Hz, 12H,  $\text{CH}(\text{CH}_3)_2$ ), 0.15 (s, 9H, -Si( $\text{CH}_3$ )<sub>3</sub>) ppm;  $^{13}\text{C}\{^1\text{H}\}$  NMR ( $\text{CDCl}_3$ , 100.53 MHz, -15 °C): 145.5 (*ortho*-C), 134.4 (*ipso*-C), 130.3 (*para*-C), 124.0 (*meta*-C), 122.6 (NCH), 28.7 ( $\text{CH}(\text{CH}_3)_2$ ), 25.1 ( $\text{CH}(\text{CH}_3)_2$ ), 23.8 ( $\text{CH}(\text{CH}_3)_2$ ), 8.3 (-Si( $\text{CH}_3$ )<sub>3</sub>) ppm;  $^{125}\text{Te}$  NMR ( $\text{CDCl}_3$ , 126.12 MHz, -15 °C): -1179 ppm. Although thermally stable, the air sensitive nature of **3** prevented combustion analytical data from being obtained.

**Synthesis of (IPrCuS)<sub>2</sub>Hg (4).** 41  $\mu\text{L}$  of S(SiMe<sub>3</sub>)<sub>2</sub> (0.194 mmol) was added to a cold (-7 °C) solution of one equivalent of IPrCu(OAc) (99 mg, 0.194 mmol) in 10 mL tetrahydrofuran, followed by storage at -25 °C overnight. The reaction solution was cooled to -70 °C to mix with 0.097 mmol Hg(OAc)<sub>2</sub> (31 mg in 5 mL of thf) at this temperature. After warming to -25 °C and keeping the solution at this temperature for 2 hrs, the solvent was removed under vacuum at 0 °C. The off-white solid was redissolved in a minimum amount of cold dichloromethane and the solution layered with 30 mL cold pentane (-70 °C). Colourless blocks as single crystals suitable for X-ray diffraction were obtained after six to seven days (~20 % yield); m.p. 139-141 °C.  $^1\text{H}$  NMR ( $\text{CD}_2\text{Cl}_2$ , 599.38 MHz, 25 °C):  $\delta$  7.48 (t,  $J$  = 7.6 Hz, 4H, *para*-CH), 7.28 (d,  $J$  = 7.6 Hz, 8H, *meta*-CH), 7.08 (s, 4H, NCH), 2.54 (sept.,  $J$  = 7.0 Hz, 8H,  $\text{CH}(\text{CH}_3)_2$ ), 1.27 (d,  $J$  = 7.0 Hz, 24H,  $\text{CH}(\text{CH}_3)_2$ ), 1.18 (d,  $J$  = 7.0 Hz, 24H,  $\text{CH}(\text{CH}_3)_2$ ) ppm;  $^{13}\text{C}\{^1\text{H}\}$  NMR ( $\text{CD}_2\text{Cl}_2$ , 150.73 MHz, 25 °C):  $\delta$  146.2 (*ortho*-C), 135.3 (*ipso*-C), 130.9 (*para*-C), 124.7 (*meta*-C), 123.3 (NCH), 29.2 ( $\text{CH}(\text{CH}_3)_2$ ), 25.4 ( $\text{CH}(\text{CH}_3)_2$ ), 24.2 ( $\text{CH}(\text{CH}_3)_2$ ) ppm. Anal. Calcd for C<sub>54</sub>H<sub>72</sub>Cu<sub>2</sub>HgN<sub>4</sub>S<sub>2</sub>: C, 55.48; H, 6.21; N, 4.79; S, 5.49. Found: C, 56.74; H, 6.38; N, 4.78; S, 5.40.

**Table S1.** Crystallographic data

|                                                   | <b>1</b> ·THF                                            | <b>2</b> ·THF                                             | <b>3</b>                                              | <b>4</b> ·4CH <sub>2</sub> Cl <sub>2</sub>                                                                        |
|---------------------------------------------------|----------------------------------------------------------|-----------------------------------------------------------|-------------------------------------------------------|-------------------------------------------------------------------------------------------------------------------|
| formula                                           | C <sub>30</sub> H <sub>45</sub> CuN <sub>2</sub> SSi·THF | C <sub>30</sub> H <sub>45</sub> CuN <sub>2</sub> SeSi·THF | C <sub>30</sub> H <sub>45</sub> CuN <sub>2</sub> SiTe | C <sub>54</sub> H <sub>72</sub> Cu <sub>2</sub> HgN <sub>4</sub> S <sub>2</sub> ·4CH <sub>2</sub> Cl <sub>2</sub> |
| formula weight                                    | 629.47                                                   | 676.37                                                    | 652.91                                                | 1508.64                                                                                                           |
| crystal system                                    | monoclinic                                               | monoclinic                                                | Monoclinic                                            | monoclinic                                                                                                        |
| space group                                       | <i>C2/c</i>                                              | <i>C2/c</i>                                               | <i>P2<sub>1</sub>/n</i>                               | <i>P2<sub>1</sub>/n</i>                                                                                           |
| <i>a</i> [Å]                                      | 28.986(15)                                               | 29.597(6)                                                 | 9.789(3)                                              | 13.026(3)                                                                                                         |
| <i>b</i> [Å]                                      | 12.887(7)                                                | 12.842(3)                                                 | 21.443(11)                                            | 16.803(3)                                                                                                         |
| <i>c</i> [Å]                                      | 19.067(9)                                                | 19.184(4)                                                 | 15.580(6)                                             | 16.264(4)                                                                                                         |
| $\alpha$ [°]                                      | 90.00                                                    | 90.00                                                     | 90.00                                                 | 90.00                                                                                                             |
| $\beta$ [°]                                       | 92.619(12)                                               | 93.196(5)                                                 | 100.673(19)                                           | 106.93(3)                                                                                                         |
| $\gamma$ [°]                                      | 90.00                                                    | 90.00                                                     | 90.00                                                 | 90.00                                                                                                             |
| <i>V</i> [Å <sup>3</sup> ]                        | 7115(6)                                                  | 7280(3)                                                   | 3214(2)                                               | 3405.6(14)                                                                                                        |
| <i>Z</i>                                          | 8                                                        | 8                                                         | 4                                                     | 2                                                                                                                 |
| $\rho_{\text{cal}}$ [g cm <sup>-3</sup> ]         | 1.175                                                    | 1.234                                                     | 1.349                                                 | 1.471                                                                                                             |
| $\mu$ (MoK $\alpha$ ) [mm <sup>-1</sup> ]         | 0.733                                                    | 1.659                                                     | 1.626                                                 | 3.279                                                                                                             |
| <i>F</i> (000)                                    | 2704                                                     | 2848                                                      | 1336                                                  | 1524                                                                                                              |
| temperature [K]                                   | 110                                                      | 110                                                       | 110                                                   | 110                                                                                                               |
| $\theta_{\text{min}}$ , $\theta_{\text{max}}$ [°] | 2.51, 27.46                                              | 2.47, 36.21                                               | 2.83, 36.00                                           | 2.66, 29.58                                                                                                       |
| total reflns                                      | 60384                                                    | 150833                                                    | 109050                                                | 18008                                                                                                             |
| unique reflns                                     | 8905                                                     | 17704                                                     | 11631                                                 | 5492                                                                                                              |
| <i>R</i> (int)                                    | 0.0771                                                   | 0.0306                                                    | 0.0305                                                | 0.0380                                                                                                            |
| <i>R</i> 1                                        | 0.0573                                                   | 0.0365                                                    | 0.0249                                                | 0.0518                                                                                                            |
| w <i>R</i> 2 [ <i>I</i> ≥ 2σ ( <i>I</i> )]        | 0.1633                                                   | 0.1025                                                    | 0.0836                                                | 0.1454                                                                                                            |
| <i>R</i> 1 (all data)                             | 0.1080                                                   | 0.0625                                                    | 0.0328                                                | 0.0658                                                                                                            |
| w <i>R</i> 2 (all data)                           | 0.2016                                                   | 0.1284                                                    | 0.0984                                                | 0.1676                                                                                                            |
| GOF                                               | 1.195                                                    | 1.081                                                     | 1.313                                                 | 1.216                                                                                                             |

## Additional Figures

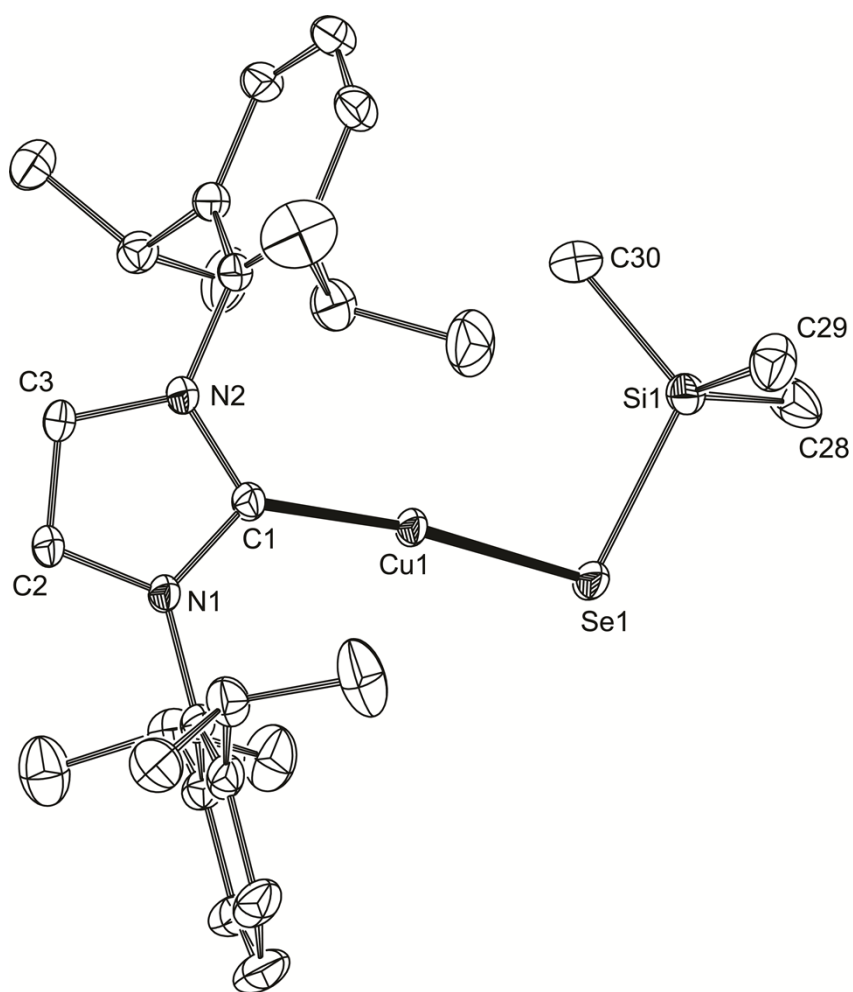

**Fig. S1.** The molecular structure of complex **2**. The thermal ellipsoids have been drawn at 40% probability. Hydrogen atoms have been omitted for clarity. Selected bond lengths (Å) and angles (°): C1-Cu1 1.884(1), Cu1-Se1 2.2431(7), Se1-Si1 2.2502(7), C1-Cu1-Se1 170.68(5), Cu1-Se1-Si1 100.42(2).

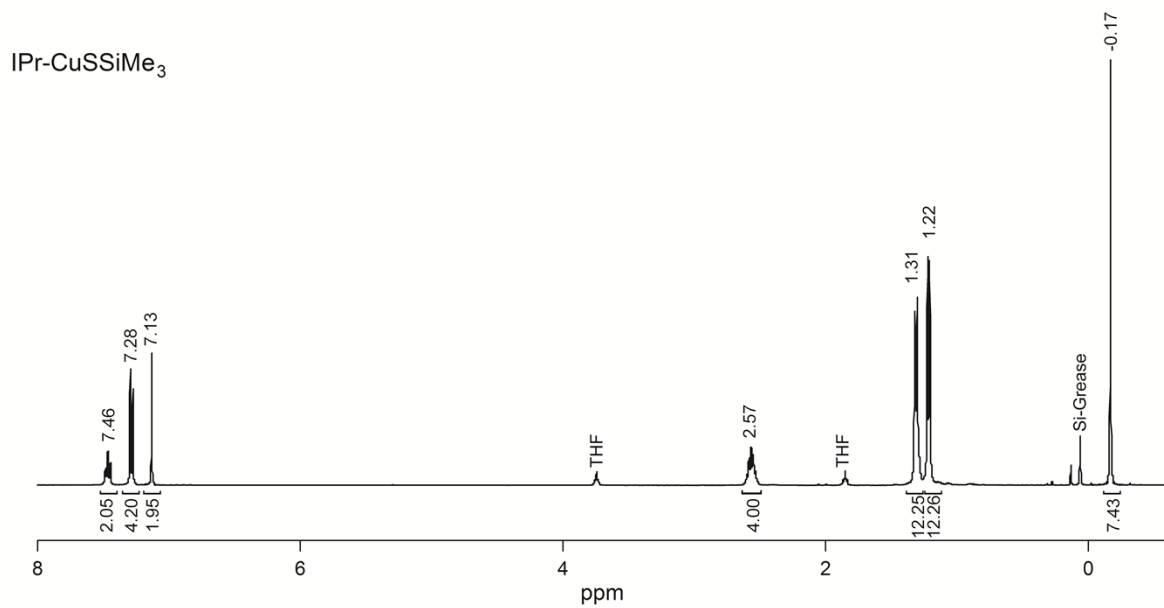

**Fig. S2.**  $^1\text{H}$  NMR spectrum of **1** ( $\text{CDCl}_3$ ,  $-10\text{ }^\circ\text{C}$ , 399.76 MHz).

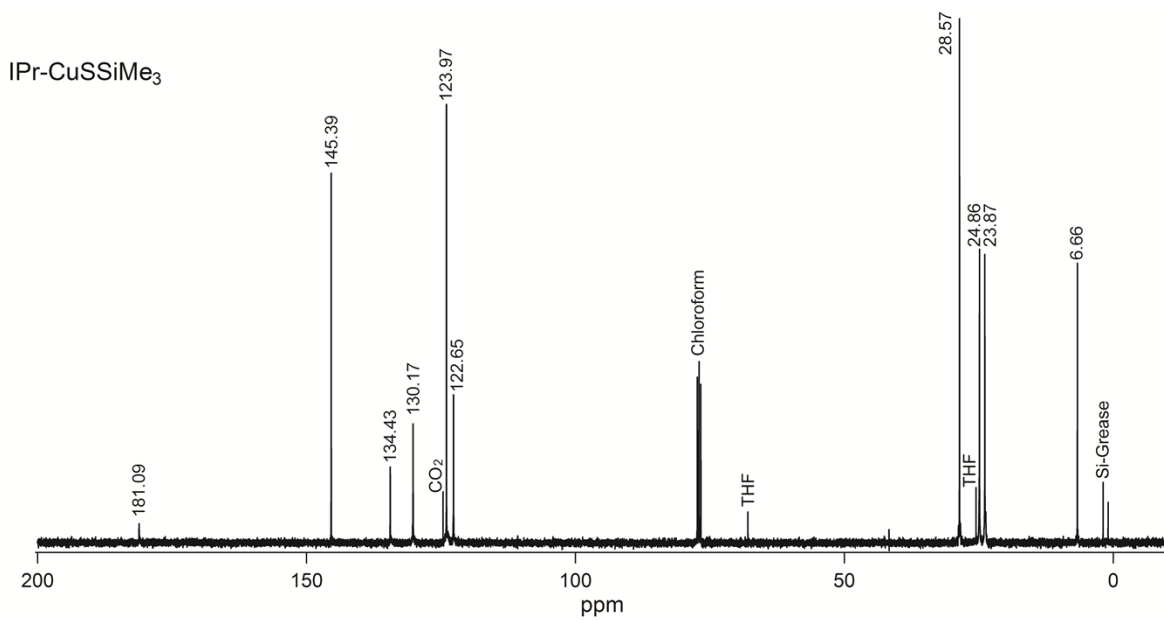

**Fig. S3.**  $^{13}\text{C}\{^1\text{H}\}$  NMR spectrum of **1** ( $\text{CDCl}_3$ ,  $-10\text{ }^\circ\text{C}$ , 100.53 MHz).

IPr-CuSeSiMe<sub>3</sub>

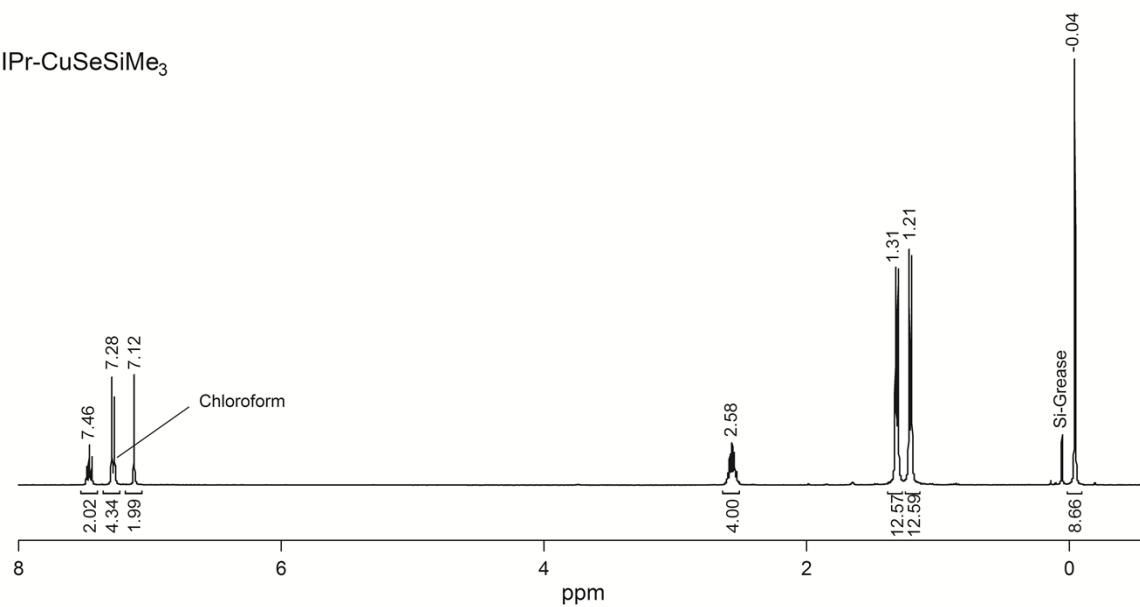

**Fig. S4.** <sup>1</sup>H NMR spectrum of **2** (CDCl<sub>3</sub>, -10 °C, 399.76 MHz).

IPr-CuSeSiMe<sub>3</sub>

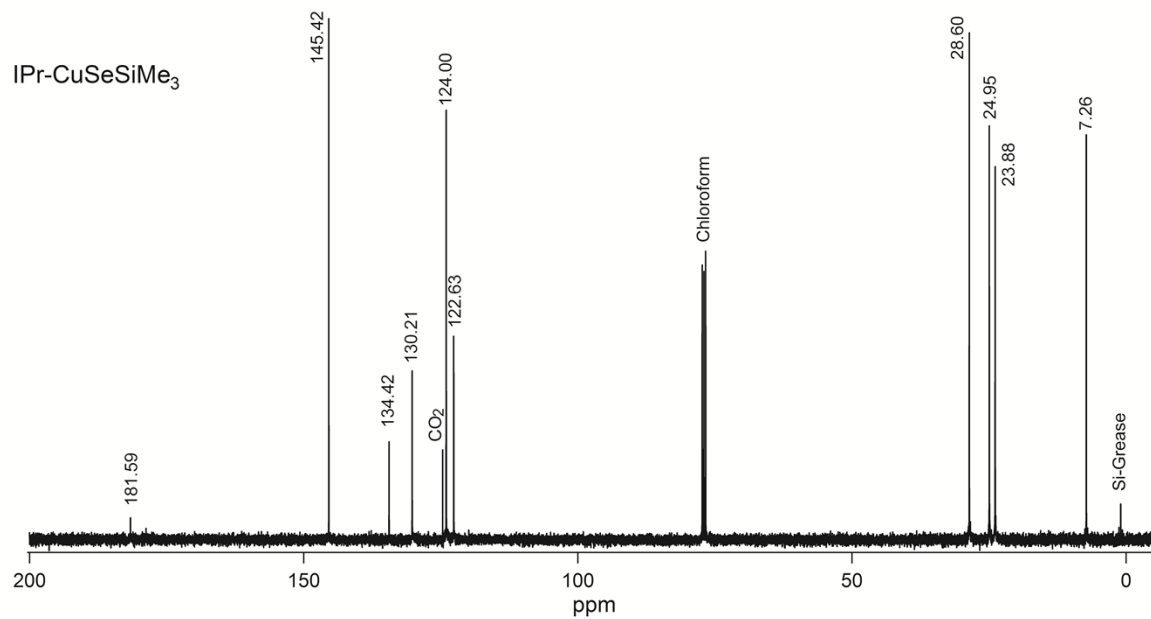

**Fig. S5.** <sup>13</sup>C{<sup>1</sup>H} NMR spectrum of **2** (CDCl<sub>3</sub>, -10 °C, 100.53 MHz).

IPr-CuTeSiMe<sub>3</sub>

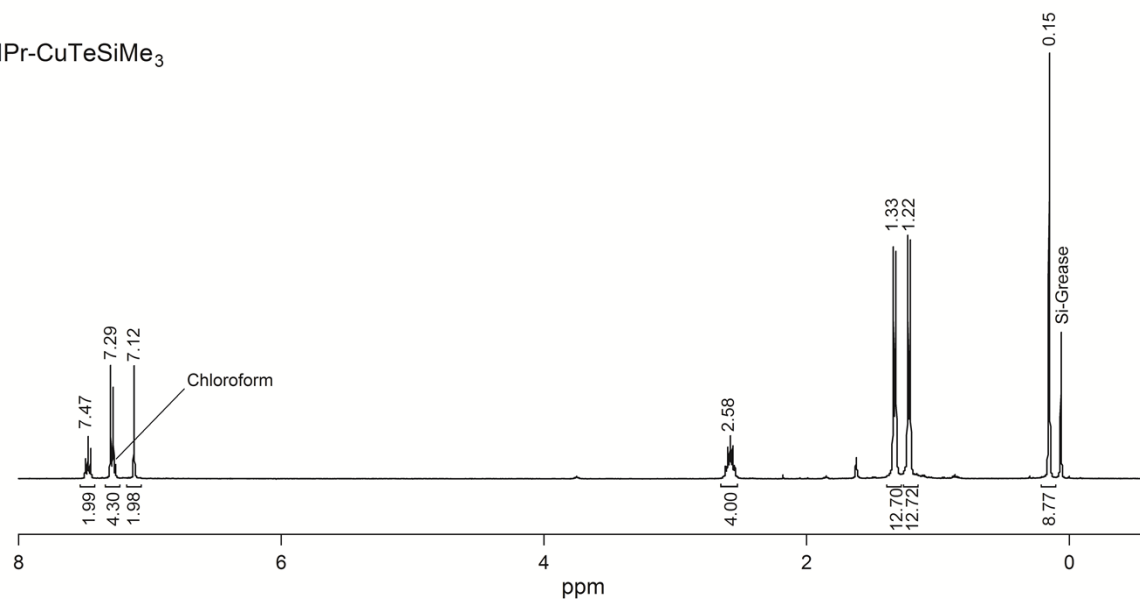

**Fig. S6.** <sup>1</sup>H NMR spectrum of **3** (CDCl<sub>3</sub>, -15 °C, 399.76 MHz).

IPr-CuTeSiMe<sub>3</sub>

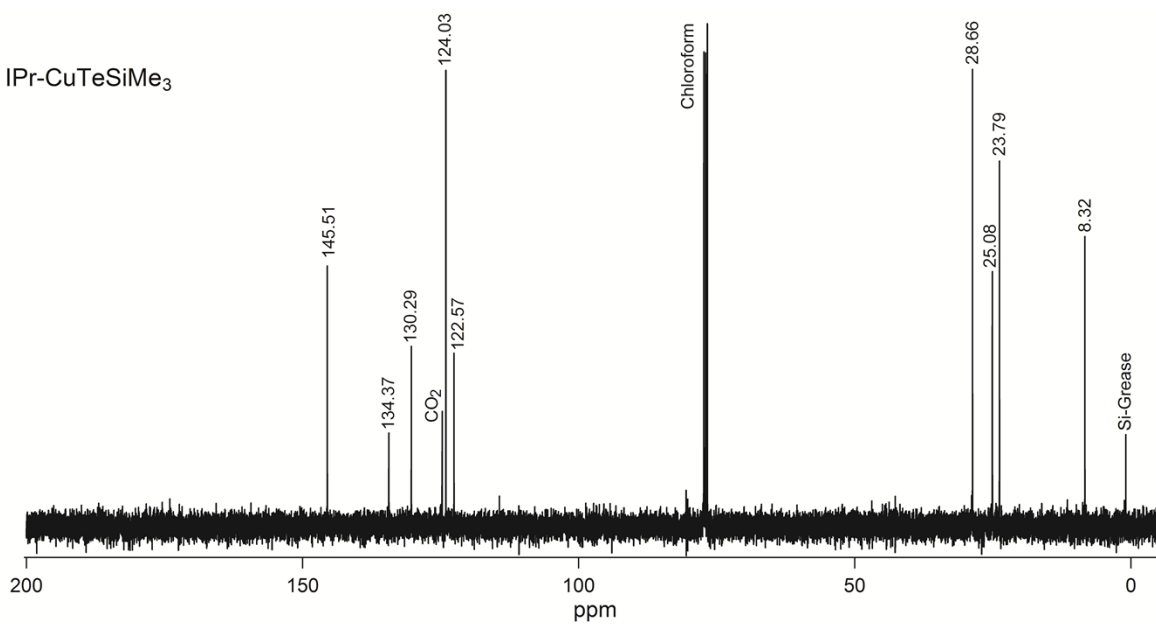

**Fig. S7.** <sup>13</sup>C{<sup>1</sup>H} NMR spectrum of **3** (CDCl<sub>3</sub>, -15 °C, 100.53 MHz).

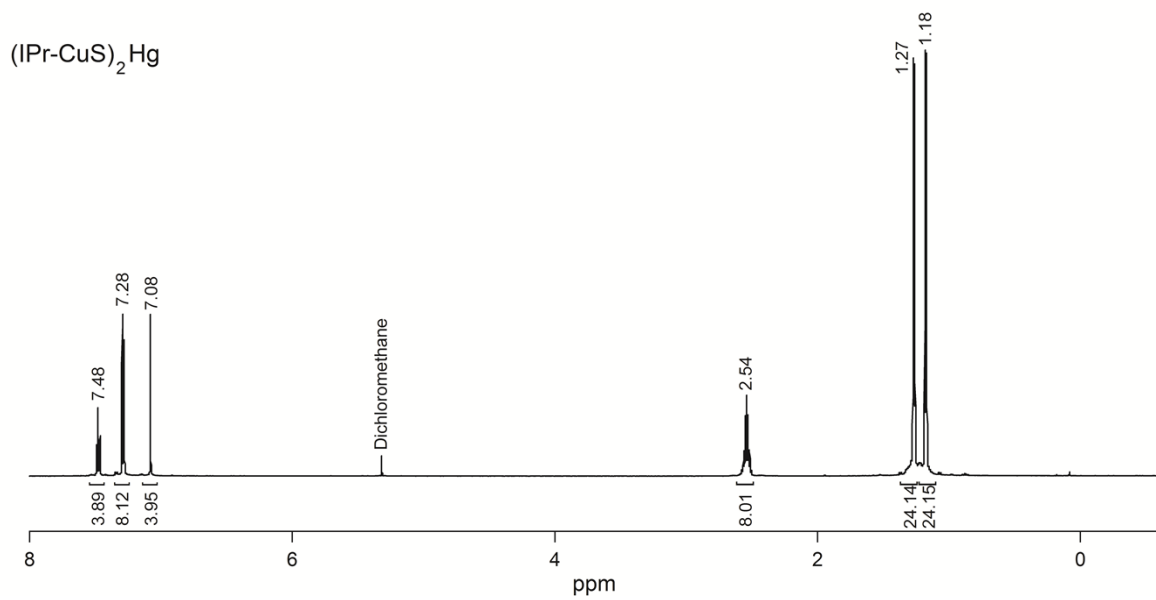

**Fig. S8.** <sup>1</sup>H NMR spectrum of **4** (CD<sub>2</sub>Cl<sub>2</sub>, 25 °C, 599.38 MHz).

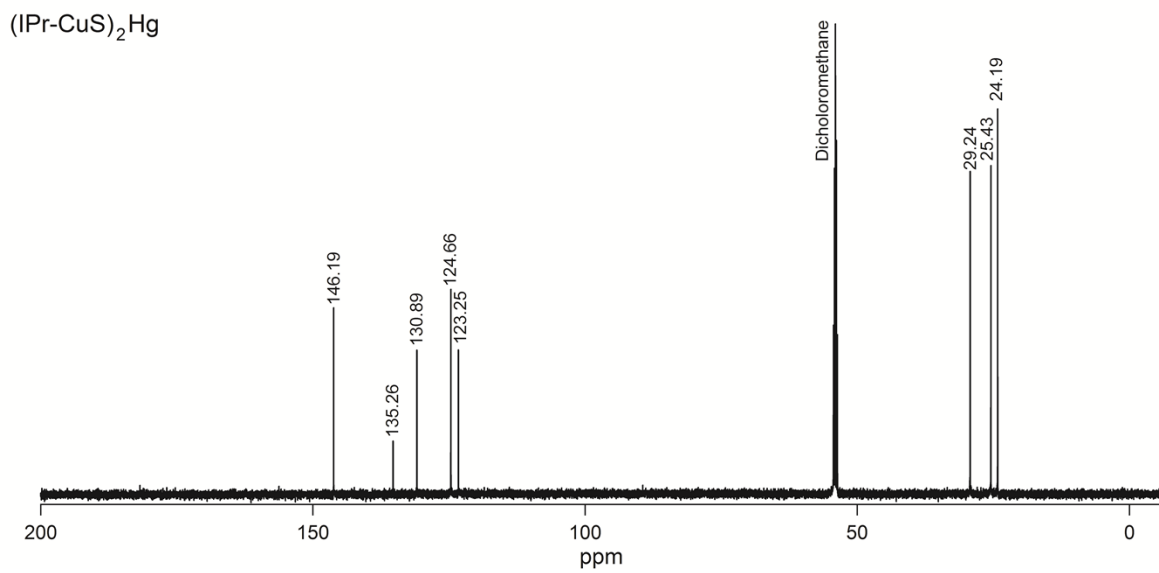

**Fig. S9.** <sup>13</sup>C{<sup>1</sup>H} NMR spectrum of **4** (CD<sub>2</sub>Cl<sub>2</sub>, 25 °C, 150.73 MHz).

1. Mankad, N. P.; Gray, T. G.; Laitar, D. S.; Sadighi, J. P., *Organometallics* 2004, **23**, 1191-1193.
2. So, J. H.; Boudjouk, P., *Synthesis* 1989, 306-307.
3. DeGroot, M. W.; Taylor, N. J.; Corrigan, J. F., *J. Mater. Chem.* 2004, **14**, 654-660.
